# Supplementary material for: Development of a blood-based molecular biomarker test for identification of schizophrenia before disease onset
Source: PubMed Central journal article supplement (PMC5068725; doi:10.1038/tp.2015.91), 2015-07-14

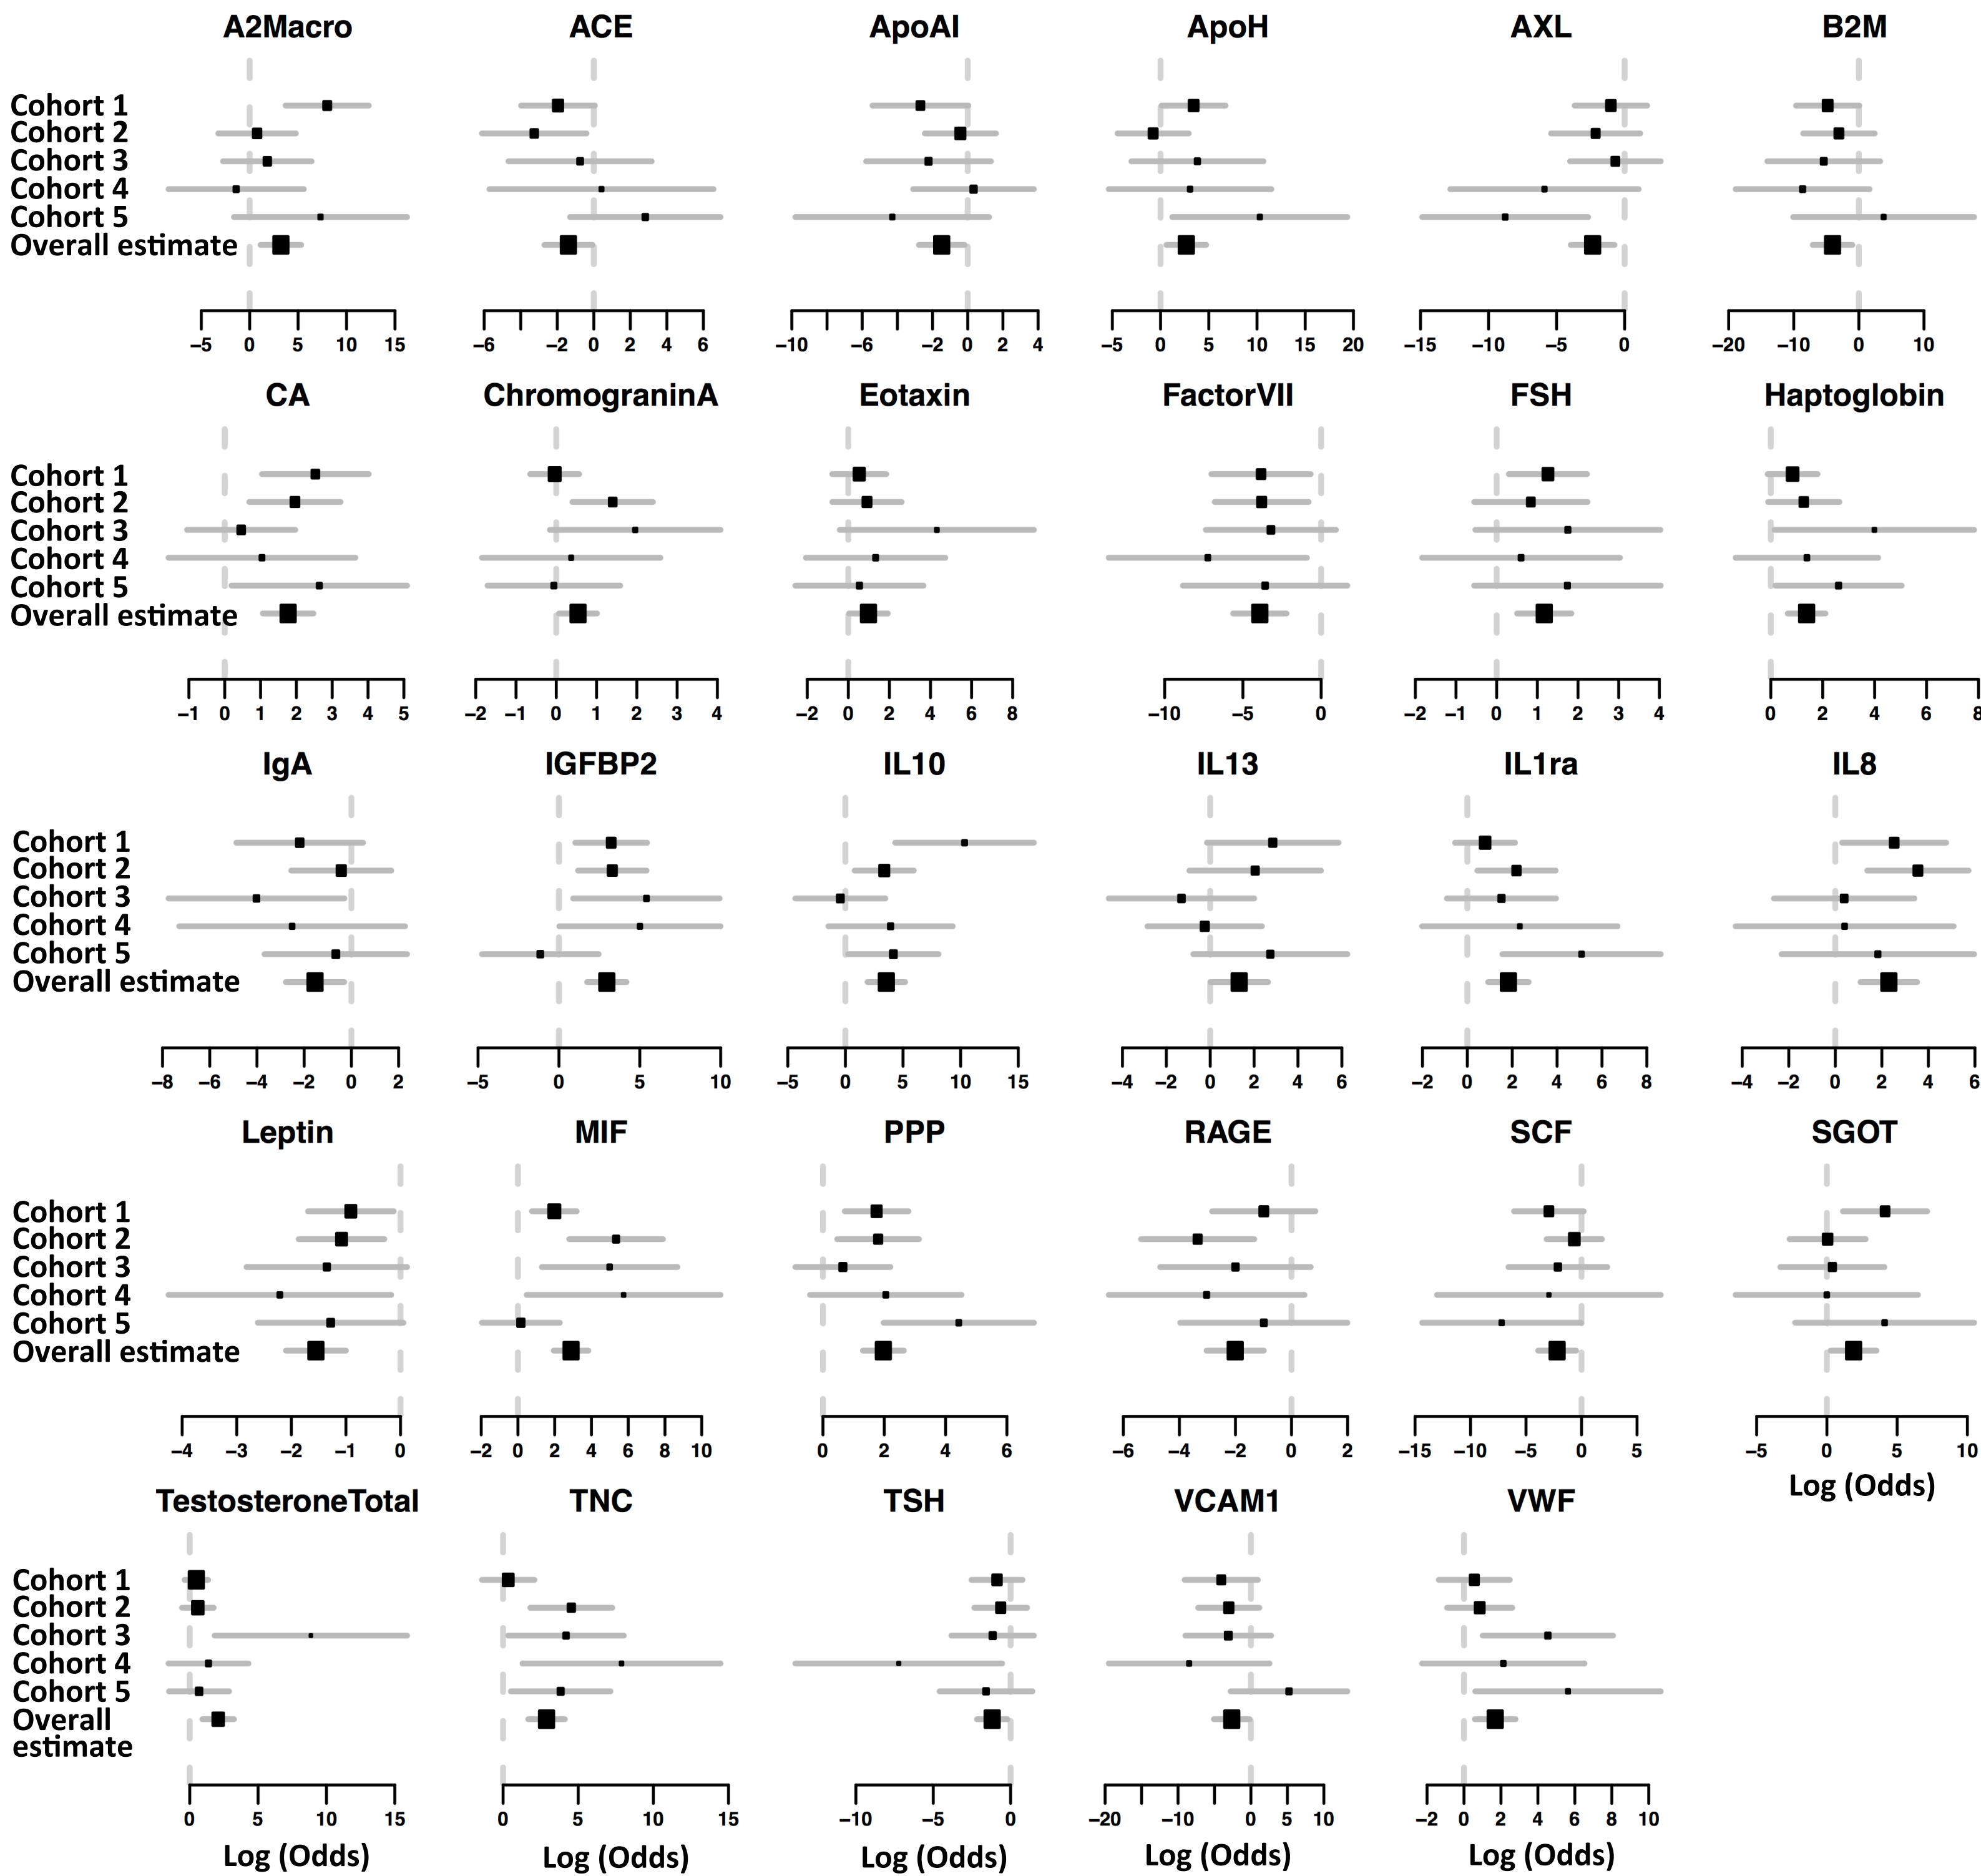

Supplement: tp201591x1.pdf [file tp201591x1.pdf]
